# Supplementary material
Source: publisher figshare collection journal article supplement (https://gsajournals.figshare.com/ndownloader/files/20276277)
Supplement: Supplementary file 1 [file 20276277]

## Sheet: Tier1 TF
FileS3.1: TF homologs
1. Arabidopsis Homologous Transcription Factors: Tier 1
Arabidopsis		Maize orthologs			Differential Expression in our study
Gene name	Gene id	Gene name	AGPv4 ID	AGPv3 ID	Mop1 wildtype ABA log2FC	mop1-1 mutant ABA log2FC
NF-YB2	AT5G47640	cadtfr6	Zm00001d006813	GRMZM2G180947	2.74	3.23
MYB44	AT5G67300	myb50	Zm00001d015614	GRMZM2G145444	NA	1.52
HB5	AT5G65310	hb41	Zm00001d017422	GRMZM2G117164	3.2	4.09
MYB44	AT5G67300	myb153	Zm00001d019712	GRMZM2G050550	1.02	0.8
HAT22	AT4G37790	hb11	Zm00001d020670	GRMZM2G127537	NA	0.86
HB6	AT2G22430	hb120	Zm00001d020804	GRMZM2G056600	0.87	0.84
NF-YB2	AT5G47640	ca3p4	Zm00001d022099	GRMZM2G384528	NA	0.63
HB6	AT2G22430	hb5	Zm00001d027991	GRMZM2G132367	NA	1.16
GBF2/ GBF3	AT4G01120 / AT2G46270	gbf1	Zm00001d039065	GRMZM2G011932	1.74	2.13
GBF2/ GBF3	AT4G01120 / AT2G46270	bzip1	Zm00001d043992	GRMZM2G117851	1.36	1.83
HAT22	AT4G37790	hb62	Zm00001d047995	GRMZM2G105834	1.05	1.17

## Sheet: Tier2 TF
FileS3.2: TF homologs
2. Arabidopsis Homologous Transcription Factors: Tier 2
Arabidopsis		Maize orthologs			Differential Expression in our study
Gene name	Gene id	Gene name	AGPv4 ID	AGPv3 ID	Mop1 wildtype ABA log2FC	mop1-1 mutant ABA log2FC
ABF1	AT1G49720	bzip4	Zm00001d018178	GRMZM2G479760	1.98	2.05
ABF3	AT4G34000	bzip49	Zm00001d031790	GRMZM2G478417	0.98	1.16
HB7	AT2G46680	hb70	Zm00001d025964	GRMZM2G396527	2.09	2.88

## Sheet: Tier3 TF
FileS3.3: TF homologs
3. Arabidopsis Homologous Transcription Factors: Tier 3
Arabidopsis		Maize orthologs			Differential Expression in our study
Gene name	Gene id	Gene name	AGPv4 ID	AGPv3 ID	Mop1 wildtype ABA log2FC	mop1-1 mutant ABA log2FC
FBH3	AT1G51140	bhlh146	Zm00001d020932	GRMZM2G085467	NA	-0.91
ANAC102	AT5G63790	nactf60	Zm00001d013003	GRMZM2G336533	NA	2.2
ANAC102	AT5G63790	nactf49	Zm00001d034601	GRMZM2G347043	NA	0.92

## Sheet: Target genes
FileS3.4: TF target gene homologs
4. Arabidopsis Homologous Target Genes
Functional	Arabidopsis		Maize orthologs			Differential Expression in our study
Cluster	Gene name	Gene id	Gene name	AGPv4 ID	AGPv3 ID	Mop1 wildtype ABA log2FC	mop1-1 mutant ABA log2FC
1	NCED3 / NCED9	AT3G14440 / AT1G78390	nced4	Zm00001d007876	GRMZM2G408158	5.8	3.94
	NCED3 / NCED9	AT3G14440 / AT1G78390	nced5	Zm00001d018819	GRMZM2G417954	NA	1.63
2	CYP707A1	AT4G19230	abh4	Zm00001d020717	GRMZM2G065928	3.14	3.55
	CYP707A1	AT4G19230	abh1	Zm00001d017762	GRMZM2G179147	1.86	2.77
	CYP707A4	AT3G19270	Zm00001d044120	Zm00001d044120	GRMZM2G177384	1.54	NA
	ABCG25	AT1G71960	Zm00001d053049	Zm00001d053049	GRMZM2G046024	1.7	1.37
4	PYR1	AT4G17870	Zm00001d047037	Zm00001d047037	GRMZM2G134731	NA	-0.94
	PYL3	AT1G73000	pyl3	Zm00001d016294	GRMZM2G154987	-1.07	NA
	PYL5	AT5G05440	Zm00001d047705	Zm00001d047705	GRMZM2G057959	NA	-2.97
	PYL5	AT5G05440	Zm00001d028793	Zm00001d028793	GRMZM2G144224	-1.68	-1.65
5	ABI1 / ABI2	AT4G26080 / AT5G57050	prh18	Zm00001d011132	GRMZM2G437575	2.21	2.5
	ABI1 / ABI2	AT4G26080 / AT5G57050	prh9	Zm00001d009626	GRMZM5G818101	1.99	2.1
	HAI2	AT1G07430	prh3	Zm00001d042886	GRMZM2G059453	2.69	2.65
	HAI2	AT1G07430	prh7	Zm00001d005609	GRMZM2G082487	1.85	2.45
	HAI2	AT1G07430	prh4	Zm00001d012401	GRMZM2G166297	2.24	2.31
	HAI2	AT1G07430	prh20	Zm00001d011495	GRMZM2G300125	2.18	2.74
	HAI2	AT1G07430	prh6	Zm00001d020100	GRMZM2G308615	NA	2.08
	HAI3	AT2G29380	prh10	Zm00001d004357	GRMZM2G019819	NA	4.72
	HAI3	AT2G29380	prh11	Zm00001d025055	GRMZM2G159811	3.47	3.94
	HAB1 / HAB2	AT1G17550	prh13	Zm00001d044301	GRMZM2G134628	2.05	2.17
	HAB1 / HAB2	AT1G17550	prh12	Zm00001d038846	GRMZM2G177386	1.96	2.2
6	OST1	AT4G33950	snrkII1	Zm00001d047220	GRMZM2G035809	NA	1.32
	SnRK2.10	AT1G60940	snrkII4	Zm00001d042695	GRMZM2G110922	NA	0.75
	SnRK2.10	AT1G60940	Zm00001d012263	Zm00001d012263	GRMZM2G334791	NA	0.86
	CPK1	AT5G04870	cdpk10	Zm00001d013109	GRMZM2G320506	NA	0.74
	CPK3	AT4G23650	cdpk17	Zm00001d011392	GRMZM2G025387	NA	-0.96
8	AFP1	AT1G69260	Zm00001d047290	Zm00001d047290	GRMZM2G053831	1.48	1.6
	AFP1	AT1G69260	Zm00001d022069	Zm00001d022069	GRMZM5G831577	2.52	2.55
	EDL3	AT3G63060	Zm00001d043180	Zm00001d043180	AC213654.3_FG004	1.99	2.76
	EDL3	AT3G63060	Zm00001d010652	Zm00001d010652	GRMZM2G073324	1.85	1.9
